# Supplementary material
Source: PubMed Central journal article supplement (PMC5340418)
Supplement: NIHMS851043-supplement-Supporting_Information.pdf [file NIHMS851043-supplement-Supporting_Information.pdf]

Supporting Information

**Oxygen Activation at the Active Site of a Fungal Lytic Polysaccharide  
Monooxygenase**

*William B. O'Dell, Pratul K. Agarwal, and Flora Meilleur\**

anie\_201610502\_sm\_miscellaneous\_information.pdf

## Table of Contents:

### Abbreviated main text citations given in full

#### Experimental details

**Table S1.** X-ray and neutron crystallographic data statistics

**Table S2.** X-ray and neutron model refinement statistics

**Table S3.** Copper–ligand distances, atomic displacement factors and occupancies in the resting state active site structure (PDB 5TKG)

**Table S4.** Copper–ligand distances, atomic displacement factors and occupancies in the ascorbate-treated active site structure (PDB 5TKH)

**Figure S1.** Electron density omit maps for oxygen species in untreated and ascorbate-treated X-ray models

**Figure S2.** Superposition of copper–dioxo model (PDB 5TKH) with PDB 4EIR

**Figure S3.** Multiple sequence alignment of AA9 proteins with known crystal structures

**Figure S4.** Fits of His157 conformational and protonation states with observed neutron scattering length density

**Figure S5.** Geometry optimized DFT active site models and the same superimposed with NCS molecule B resting state active site structure (PDB 5TKG)

**Table S5.** Atomic coordinates of geometry optimized DFT active site models

**Figure S6.** Superposition of copper–dioxo model (PDB 5TKH) with PDB 5ACJ and 5ACI

**Figure S7.** X-ray fluorescence scan of a *NcPMO-2* crystal near the copper K-edge

### Abbreviated main text citations given in full

- [1a] P. V. Harris, D. Welner, K. C. McFarland, E. Re, J. C. N. Poulsen, K. Brown, R. Salbo, H. S. Ding, E. Vlasenko, S. Merino, F. Xu, J. Cherry, S. Larsen, L. Lo Leggio, *Biochemistry* **2010**, *49*, 3305-3316.
- [4] C. H. Kjaergaard, M. F. Qayyum, S. D. Wong, F. Xu, G. R. Hemsworth, D. J. Walton, N. A. Young, G. J. Davies, P. H. Walton, K. S. Johansen, K. O. Hodgson, B. Hedman, E. I. Solomon, *Proc. Natl. Acad. Sci. U. S. A.* **2014**, *111*, 8797-8802.
- [8] M. Gudmundsson, S. Kim, M. Wu, T. Ishida, M. H. Momeni, G. Vaaje-Kolstad, D. Lundberg, A. Royant, J. Stahlberg, V. G. H. Eijsink, G. T. Beckham, M. Sandgren, *J. Biol. Chem.* **2014**, *289*, 18782-18792.
- [11] K. E. Frandsen, T. J. Simmons, P. Dupree, J. C. Poulsen, G. R. Hemsworth, L. Ciano, E. M. Johnston, M. Tovborg, K. S. Johansen, P. von Freiesleben, L. Marmuse, S. Fort, S. Cottaz, H. Driguez, B. Henrissat, N. Lenfant, F. Tuna, A. Baldansuren, G. J. Davies, L. Lo Leggio, P. H. Walton, *Nature Chem. Biol.* **2016**, *12*, 298-303.
- [12a] N. Colloc'h, L. Gabison, G. Monard, M. Altarsha, M. Chiadmi, G. Marassio, J. S. D. O. Santos, M. El Hajji, B. Castro, J. H. Abraini, T. Prange, *Biophys. J.* **2008**, *95*, 2415-2422.

## Experimental details

### Crystallization and crystal soaking

Heterologous protein production of *NcPMO-2* from *Pichia pastoris* host, crystallization and data collection methods used are described elsewhere by O'Dell *et al.* Protein was crystallized for these studies as expressed with respect to the bound metal ion. X-ray fluorescence scans of crystals from “as expressed” protein, Figure S7, showed an edge centered at 8984 electron volts (eV) corresponding to copper(I) which can be attributed to the facile photoreduction of the copper ion in X-ray fluorescence studies.[S1] (Scans near absorption edges of other metals were not performed.) The crystallization behaviors of metal-exchanged forms of *NcPMO-2* were used to confirm further that the active site of the crystallized protein predominantly contains a copper ion as opposed to nickel or zinc which have been observed in other AA9 LPMO structures.[S2, 3] Apo-*NcPMO-2* was prepared by treating the protein with agarose-immobilized nitrilotriacetic acid.[S4, 5] Reconstituting the metal coordination site by diluting apo-*NcPMO-2* to a 100-fold molar excess of 10 mM  $\text{CuCl}_2$  in 20 mM  $\text{Na}(\text{CH}_3\text{COO}^-)$ , incubation for two hours, concentration and chromatographic desalting resulted in Cu holo-*NcPMO-2* with identical crystallization behavior of the “as expressed” protein. Reconstituting apo-*NcPMO-2* with either 10 mM  $\text{NiSO}_4$  or 10 mM  $\text{ZnCl}_2$  yielded holo-*NcPMO-2* which would not crystallize under the precipitant and pH conditions used to crystallize “as expressed” *NcPMO-2* for this study.

For ascorbate-treated structures, crystals were harvested and transferred to a soaking solution containing 100 mM HEPES, 100 mM ascorbic acid pH = 6.0 and 25%

(wt./vol.) PEG 3350. Crystals were incubated at room temperature for two hours prior to flash freezing for data collection. All crystal manipulations were conducted in air.

## Model refinement

X-ray diffraction intensities and starting atomic coordinates derived from PDB 4EIR were used for molecular replacement with *Phaser* as implemented in *PHENIX*.<sup>[S6-8]</sup> Automated structure rebuilding of the resulting model by *PHENIX AutoBuild* was used to minimize phase bias from the replacement model.<sup>[S9]</sup> Models were refined against X-ray data using *phenix.refine*.<sup>[S10]</sup> For PDB 5TKI neutron data were added to the model after several rounds of refinement against the X-ray data so that the model was jointly refined against X-ray data for heavy atoms and neutron data for hydrogen and deuterium atoms.<sup>[S11]</sup> The conformation and protonation state of His157 was determined by refining single N<sub>δ</sub> protonated, single N<sub>ε</sub> protonated and double N<sub>δ</sub>,N<sub>ε</sub> protonated forms against the neutron scattering length density in the two sidechain conformations that could be fitted to the electron density. (Here, “protonated” refers to 100% occupancy of <sup>2</sup>H due to the <sup>1</sup>H/<sup>2</sup>H exchange of the protein crystal prior to neutron and X-ray diffraction measurement.)

Dataset and final refinement statistics shown for all models in Tables S1 and S2 were calculated using *phenix.table\_one*.<sup>[S12]</sup> The precision of atomic coordinates in the models 5TKG (0.030 Å average) and 5TKH (0.035 Å average) were estimated by evaluating the Cruickshank diffraction precision index for the model as implemented in the web server *Online\_DPI*.<sup>[S13-15]</sup> Selected coordinate precision estimates are reported in Tables S3 and S4. Simple omit maps for the dioxygen species observed in

5TKG and 5TKH were calculated by removing the oxygen atom proximal to copper, distal to copper or both oxygen atoms and calculating  $F_{\text{O}}-F_{\text{C}}$  difference electron density. Positive contours of the  $F_{\text{O}}-F_{\text{C}}$  density extending for 10.0 Å around the omitted atoms are shown in Fig. S1.

### Multiple sequence alignment

Amino acid sequences of the crystallized portions of AA9 LPMOs *Neurospora crassa* PMO-2, *Neurospora crassa* PMO-3, *Neurospora crassa* LPMO9-F, *Neurospora crassa* LPMO9-C, *Lentinus similis* (AA9)-A, *Phanerochaete chrysosporium* GH61-D, *Thermoascus aurantiacus* GH61-A, *Thelavia terrestris* GH61-E and *Trichoderma reesei* CEL61B were obtained from PDB entries 5TKG, 4EIS, 4QI8, 4D7U, 5ACF, 4B5Q, 2YET, 3EII, and 2VTC, respectively. Multiple sequence alignment was performed with the T-coffee server, and results were formatted using ESPript.[S16, 17]

### Density functional theory calculations

The three active site models (ASMs) used for DFT calculation were derived by extracting coordinates from the resting state X-ray structure (PDB 5TKG) including residues His1, His84, His157, Gln166 and Tyr168 along with the active site copper(II) ion, pre-bound molecular  $\text{O}_2$  and the axial and equatorial water molecules as shown in Fig S3. To reduce the total number of atoms in the ASMs, residues His84, His157, Gln166 and Tyr168 were truncated at  $\text{C}_\beta$  which was modeled as a methyl group. DFT calculations were performed with Gaussian 09 using the uB3LYP functional with the 6-31g\*\* basis set applied to all atoms.[S18] The model was implicitly solvated using the

polarizable continuum model as implemented in Gaussian 09 with a dielectric constant of 4.24. For geometry optimization, the coordinates of one heavy atom per residue, indicated by a star in Figure S3, were constrained to their starting values to maintain the relative conformation imposed by the protein backbone. Molecular O<sub>2</sub> “pre-binding” energies were estimated by the difference between two forms of each ASM: one with molecular O<sub>2</sub> occupying the pre-binding site and the other with molecular O<sub>2</sub> moved to a distance >10 Å from other atoms in the model and the pre-binding site left vacant.

## References

- S1. Kjaergaard, C.H., M.F. Qayyum, S.D. Wong, F. Xu, G.R. Hemsworth, D.J. Walton, N.A. Young, G.J. Davies, P.H. Walton, K.S. Johansen, K.O. Hodgson, B. Hedman, and E.I. Solomon, *Spectroscopic and computational insight into the activation of O<sub>2</sub> by the mononuclear Cu center in polysaccharide monooxygenases*. Proceedings of the National Academy of Sciences of the United States of America, 2014. **111**(24): p. 8797-8802.
- S2. Karkehabadi, S., H. Hansson, S. Kim, K. Piens, C. Mitchinson, and M. Sandgren, *The First Structure of a Glycoside Hydrolase Family 61 Member, Cel61B from Hypocrea jecorina, at 1.6 angstrom Resolution*. Journal of Molecular Biology, 2008. **383**(1): p. 144-154.
- S3. Harris, P.V., D. Welner, K.C. McFarland, E. Re, J.C.N. Poulsen, K. Brown, R. Salbo, H.S. Ding, E. Vlasenko, S. Merino, F. Xu, J. Cherry, S. Larsen, and L. Lo Leggio, *Stimulation of Lignocellulosic Biomass Hydrolysis by Proteins of Glycoside Hydrolase Family 61: Structure and Function of a Large, Enigmatic Family*. Biochemistry, 2010. **49**(15): p. 3305-3316.
- S4. Carrer, C., M. Stolz, E. Lewitzki, C. Rittmeyer, B.O. Kolbesen, and E. Grell, *Removing coordinated metal ions from proteins: a fast and mild method in aqueous solution*. Analytical and Bioanalytical Chemistry, 2006. **385**(8): p. 1409-1413.
- S5. Quinlan, R.J., M.D. Sweeney, L. Lo Leggio, H. Otten, J.C.N. Poulsen, K.S. Johansen, K. Krogh, C.I. Jorgensen, M. Tovborg, A. Anthonsen, T. Tryfona, C.P. Walter, P. Dupree, F. Xu, G.J. Davies, and P.H. Walton, *Insights into the oxidative degradation of cellulose by a copper metalloenzyme that exploits biomass components*. Proceedings of the National Academy of Sciences of the United States of America, 2011. **108**(37): p. 15079-15084.
- S6. McCoy, A.J., R.W. Grosse-Kunstleve, P.D. Adams, M.D. Winn, L.C. Storoni, and R.J. Read, *Phaser crystallographic software*. Journal of Applied Crystallography, 2007. **40**: p. 658-674.

- S7. Adams, P.D., P.V. Afonine, G. Bunkoczi, V.B. Chen, I.W. Davis, N. Echols, J.J. Headd, L.W. Hung, G.J. Kapral, R.W. Grosse-Kunstleve, A.J. McCoy, N.W. Moriarty, R. Oeffner, R.J. Read, D.C. Richardson, J.S. Richardson, T.C. Terwilliger, and P.H. Zwart, *PHENIX: a comprehensive Python-based system for macromolecular structure solution*. Acta Crystallographica, Section D: Biological Crystallography, 2010. **66**(Pt 2): p. 213-21.
- S8. Li, X., W.T. Beeson, C.M. Phillips, M.A. Marletta, and J.H.D. Cate, *Structural Basis for Substrate Targeting and Catalysis by Fungal Polysaccharide Monooxygenases*. Structure, 2012. **20**(6): p. 1051-1061.
- S9. Terwilliger, T.C., R.W. Grosse-Kunstleve, P.V. Afonine, N.W. Moriarty, P.H. Zwart, L.W. Hung, R.J. Read, and P.D. Adams, *Iterative model building, structure refinement and density modification with the PHENIX AutoBuild wizard*. Acta Crystallographica Section D-Biological Crystallography, 2008. **64**: p. 61-69.
- S10. Afonine, P.V., R.W. Grosse-Kunstleve, N. Echols, J.J. Headd, N.W. Moriarty, M. Mustyakimov, T.C. Terwilliger, A. Urzhumtsev, P.H. Zwart, and P.D. Adams, *Towards automated crystallographic structure refinement with phenix.refine*. Acta Crystallographica, Section D: Biological Crystallography, 2012. **68**(Pt 4): p. 352-67.
- S11. Afonine, P.V., M. Mustyakimov, R.W. Grosse-Kunstleve, N.W. Moriarty, P. Langan, and P.D. Adams, *Joint X-ray and neutron refinement with phenix.refine*. Acta Crystallographica, Section D: Biological Crystallography, 2010. **66**(Pt 11): p. 1153-63.
- S12. Afonine, P.V., R.W. Grosse-Kunstleve, V.B. Chen, J.J. Headd, N.W. Moriarty, J.S. Richardson, D.C. Richardson, A. Urzhumtsev, P.H. Zwart, and P.D. Adams, *phenix.model\_vs\_data: a high-level tool for the calculation of crystallographic model and data statistics*. J Appl Crystallogr, 2010. **43**(Pt 4): p. 669-676.
- S13. Cruickshank, D., *Remarks about protein structure precision*. Acta Crystallographica Section D, 1999. **55**(3): p. 583-601.
- S14. Gurusaran, M., M. Shankar, R. Nagarajan, J.R. Helliwell, and K. Sekar, *Do we see what we should see? Describing non-covalent interactions in protein structures including precision*. IUCrJ, 2014. **1**(1): p. 74-81.
- S15. Kumar, K.S.D., M. Gurusaran, S.N. Satheesh, P. Radha, S. Pavithra, K.P.S. Thulaa Tharshan, J.R. Helliwell, and K. Sekar, *Online\_DPI: a web server to calculate the diffraction precision index for a protein structure*. Journal of Applied Crystallography, 2015. **48**(3): p. 939-942.
- S16. Robert, X. and P. Gouet, *Deciphering key features in protein structures with the new ENDscript server*. Nucleic Acids Research, 2014. **42**(W1): p. W320-W324.
- S17. Di Tommaso, P., S. Moretti, I. Xenarios, M. Orobityg, A. Montanyola, J.-M. Chang, J.-F. Taly, and C. Notredame, *T-Coffee: a web server for the multiple sequence alignment of protein and RNA sequences using structural information and homology extension*. Nucleic Acids Research, 2011. **39**(suppl 2): p. W13-W17.
- S18. Frisch, M.J., G.W. Trucks, H.B. Schlegel, G.E. Scuseria, M.A. Robb, J.R. Cheeseman, G. Scalmani, V. Barone, B. Mennucci, G.A. Petersson, H. Nakatsuji, M. Caricato, X. Li, H.P. Hratchian, A.F. Izmaylov, J. Bloino, G. Zheng, J.L. Sonnenberg, M. Hada, M. Ehara, K. Toyota, R. Fukuda, J. Hasegawa, M. Ishida, T. Nakajima, Y. Honda, O. Kitao, H. Nakai, T. Vreven, J.A. Montgomery



Jr., J.E. Peralta, F. Ogliaro, M.J. Bearpark, J. Heyd, E.N. Brothers, K.N. Kudin, V.N. Staroverov, R. Kobayashi, J. Normand, K. Raghavachari, A.P. Rendell, J.C. Burant, S.S. Iyengar, J. Tomasi, M. Cossi, N. Rega, N.J. Millam, M. Klene, J.E. Knox, J.B. Cross, V. Bakken, C. Adamo, J. Jaramillo, R. Gomperts, R.E. Stratmann, O. Yazyev, A.J. Austin, R. Cammi, C. Pomelli, J.W. Ochterski, R.L. Martin, K. Morokuma, V.G. Zakrzewski, G.A. Voth, P. Salvador, J.J. Dannenberg, S. Dapprich, A.D. Daniels, Ö. Farkas, J.B. Foresman, J.V. Ortiz, J. Cioslowski, and D.J. Fox, *Gaussian 09*, 2009, Gaussian, Inc.: Wallingford, CT, USA.

**Table S1.** X-ray and neutron crystallographic data statistics.

| <b>PDB ID</b>                                                             | <b>5TKG</b>                   | <b>5TKH</b>                    | <b>5TKI</b>                   | <b>5TKI</b>                   |
|---------------------------------------------------------------------------|-------------------------------|--------------------------------|-------------------------------|-------------------------------|
| <b>Incident Radiation</b>                                                 | X-ray                         | X-ray                          | X-ray                         | Neutron                       |
| <b>Wavelength (Å)</b>                                                     | 1.00                          | 1.00                           | 1.54                          | 2.85-4.50                     |
| <b>Resolution range (Å)</b>                                               | 28.73 – 1.20<br>(1.24 – 1.20) | 31.82 – 1.20<br>(1.243 – 1.20) | 36.10 – 1.50<br>(1.55 – 1.50) | 32.87 – 2.12<br>(2.19 – 2.12) |
| <b>Space group</b>                                                        | P 1 21 1                      | P 1 21 1                       | P 1 21 1                      | P 1 21 1                      |
| <b>Unit cell (a, b, c) (Å)</b>                                            | 67.35, 42.21, 69.48           | 67.17, 42.24, 69.37            | 68.12, 42.23, 70.29           | 68.12, 42.23, 70.29           |
| <b>(<math>\alpha</math>, <math>\beta</math>, <math>\gamma</math>) (°)</b> | 90, 98.96, 90                 | 90, 98.65, 90                  | 90, 98.33, 90                 | 90, 98.33, 90                 |
| <b>Total reflections</b>                                                  | 228097 (21939)                | 227779 (22042)                 | 224095 (20772)                | 31698 (2251)                  |
| <b>Unique reflections</b>                                                 | 117125 (11360)                | 115269 (11178)                 | 58482 (5409)                  | 18141 (1381)                  |
| <b>Multiplicity</b>                                                       | 1.9 (1.9)                     | 2.0 (2.0)                      | 3.8 (3.8)                     | 1.7 (1.6)                     |
| <b>Completeness (%)</b>                                                   | 97.0 (94.6)                   | 95.7 (93.4)                    | 90.2 (80.3)                   | 79.0 (61.0)                   |
| <b>Mean intensity/sigma(intensity)</b>                                    | 7.21 (4.18)                   | 5.86 (4.23)                    | 13.8 (4.2)                    | 4.9 (3.6)                     |
| <b>Wilson B-factor (Å<sup>2</sup>)</b>                                    | 8.77                          | 8.37                           | 16.04                         | 8.08                          |
| <b>R<sub>merge</sub></b>                                                  | 0.0732 (0.1512)               | 0.1091 (0.1416)                | 0.0540 (0.3406)               | 0.1277 (0.1903)               |
| <b>R<sub>meas</sub></b>                                                   | 0.1034 (0.2138)               | 0.1543 (0.2003)                | 0.0633 (0.3963)               | 0.1806 (0.2691)               |
| <b>CC1/2</b>                                                              | 0.982 (0.897)                 | 0.950 (0.895)                  | 0.999 (0.892)                 | 0.926 (0.754)                 |

**Table S2.** X-ray and neutron model refinement statistics.

| <b>PDB ID</b>                         | <b>5TKG</b>     | <b>5TKH</b>     | <b>5TKI (X-ray)</b> | <b>5TKI (neutron)</b> |
|---------------------------------------|-----------------|-----------------|---------------------|-----------------------|
| <b>Reflections used in refinement</b> | 117101 (11354)  | 115249 (11177)  | 57483 (5061)        | 18134 (1381)          |
| <b>Reflections used for R-free</b>    | 1997 (202)      | 1992 (203)      | 1967 (174)          | 630 (54)              |
| <b>R-work</b>                         | 0.1142 (0.1275) | 0.1279 (0.1174) | 0.1476 (0.2550)     | 0.2142 (0.3143)       |
| <b>R-free</b>                         | 0.1399 (0.1650) | 0.1540 (0.1619) | 0.1790 (0.2901)     | 0.2508 (0.3562)       |
| <b>CC(work)</b>                       | 0.977 (0.964)   | 0.953 (0.956)   | 0.980 (0.893)       | 0.886 (0.485)         |
| <b>CC(free)</b>                       | 0.968 (0.926)   | 0.912 (0.960)   | 0.980 (0.837)       | 0.830 (0.105)         |
| <b>Number of non-hydrogen atoms</b>   | 4699            | 4503            | 3841                | 3841                  |
| <b>Macromolecules</b>                 | 3705            | 3578            | 3404                | 3404                  |
| <b>Ligands</b>                        | 73              | 62              | 58                  | 58                    |
| <b>Solvent</b>                        | 921             | 863             | 379                 | 379                   |
| <b>Protein residues</b>               | 446             | 446             | 446                 | 446                   |
| <b>RMS(bonds)</b>                     | 0.009           | 0.008           | 0.015               | 0.015                 |
| <b>RMS(angles)</b>                    | 1.18            | 1.10            | 1.45                | 1.45                  |
| <b>Ramachandran favored (%)</b>       | 97.0            | 96.0            | 96.0                | 96.0                  |
| <b>Ramachandran allowed (%)</b>       | 2.9             | 2.9             | 2.7                 | 2.7                   |
| <b>Ramachandran outliers (%)</b>      | 0.23            | 0.68            | 0.9                 | 0.9                   |
| <b>Rotamer outliers (%)</b>           | 1.7             | 1.3             | 2.4                 | 2.4                   |
| <b>Clash score</b>                    | 2.01            | 1.67            | 4.40                | 9.99                  |
| <b>Average B-factor</b>               | 14.44           | 13.66           | 21.54               | 21.54                 |
| <b>Macromolecules</b>                 | 11.30           | 10.89           | 20.04               | 20.04                 |
| <b>Ligands</b>                        | 23.56           | 22.02           | 36.09               | 36.09                 |
| <b>Solvent</b>                        | 26.34           | 24.53           | 32.75               | 32.75                 |

**Table S3.** Copper–ligand distances and selected atomic displacement factors in the resting state active site structure (PDB 5TKG).

|                                                               | Molecule A   | Molecule B   |
|---------------------------------------------------------------|--------------|--------------|
| Atomic displacement factor ( $\text{\AA}^2$ ) <sup>a</sup>    |              |              |
| copper(II) ion                                                | 8.40         | 7.44         |
| equatorial water                                              | 13.68        | 12.25        |
| axial water                                                   | 17.33        | 16.06        |
| pre-bound oxygen                                              | 19.68        | 18.85        |
| Occupancies                                                   |              |              |
| copper(II) ion                                                | 1.00         | 1.00         |
| equatorial water                                              | 1.00         | 1.00         |
| axial water                                                   | 1.00         | 1.00         |
| pre-bound oxygen                                              | 0.49         | 0.57         |
| Coordinate error (DPI estimate) <sup>b</sup> ( $\text{\AA}$ ) |              |              |
| copper(II) ion                                                | 0.023        | 0.021        |
| equatorial water                                              | 0.029        | 0.027        |
| axial water                                                   | 0.032        | 0.031        |
| pre-bound oxygen (O1, O2)                                     | 0.035, 0.035 | 0.034, 0.034 |
| Distances ( $\text{\AA}$ )                                    |              |              |
| Cu–H1–N <sub>δ</sub>                                          | 1.96         | 1.96         |
| Cu–H1–N <sub>amino</sub>                                      | 2.13         | 2.09         |
| Cu–H84–N <sub>ε</sub>                                         | 2.00         | 1.99         |
| Cu–Y168–OH                                                    | 2.64         | 2.59         |
| Cu–H <sub>2</sub> O <sub>equatorial</sub>                     | 2.00         | 1.96         |
| Cu–H <sub>2</sub> O <sub>axial</sub>                          | 2.44         | 2.36         |
| Cu–O1                                                         | 4.61         | 4.91         |
| O1–O2                                                         | 1.21         | 1.20         |

<sup>a</sup>. All non-hydrogen atoms in the model were refined with anisotropic atomic displacement parameters. Converted isotropic *B*-factors are shown here.

<sup>b</sup>. diffraction precision index

**Table S4.** Copper–ligand distances and selected atomic displacement factors in the ascorbate-treated active site structure (PDB 5TKH).

|                                                               | Molecule A   | Molecule B   |
|---------------------------------------------------------------|--------------|--------------|
| Atomic displacement factor ( $\text{\AA}^2$ ) <sup>a</sup>    |              |              |
| copper(II) ion                                                | 8.39         | 9.07         |
| equatorial water                                              | --           | 34.60        |
| axial water                                                   | 28.14        | 29.21        |
| peroxide                                                      | 18.98        | --           |
| pre-bound oxygen                                              | --           | 26.27        |
| Occupancies (%)                                               |              |              |
| copper(II) ion                                                | 1.00         | 1.00         |
| equatorial water                                              | --           | 0.60         |
| axial water                                                   | 0.48         | 0.34         |
| peroxide                                                      | 0.59         | --           |
| pre-bound oxygen                                              | --           | 0.60         |
| Coordinate error (DPI estimate) <sup>b</sup> ( $\text{\AA}$ ) |              |              |
| copper(II) ion                                                | 0.027        | 0.028        |
| equatorial water                                              | --           | 0.055        |
| axial water                                                   | 0.050        | 0.051        |
| peroxide (O1, O2)                                             | 0.041, 0.041 | --           |
| pre-bound oxygen (O1, O2)                                     | --           | 0.048, 0.048 |
| Distances ( $\text{\AA}$ )                                    |              |              |
| Cu–H1–N $\delta$                                              | 1.93         | 1.95         |
| Cu–H1–N <sub>amino</sub>                                      | 2.19         | 2.20         |
| Cu–H84–N $\epsilon$                                           | 1.97         | 1.90         |
| Cu–Y168–OH                                                    | 2.66         | 2.73         |
| Cu–H <sub>2</sub> O <sub>equatorial</sub>                     | --           | 2.06         |
| Cu–H <sub>2</sub> O <sub>axial</sub>                          | 2.36         | 2.23         |
| Cu–O1                                                         | 1.90         | 3.57         |
| O1–O2                                                         | 1.44         | 1.20         |

<sup>a</sup>. All non-hydrogen atoms in the model were refined with anisotropic atomic displacement parameters. Converted isotropic *B*-factors are shown here.

<sup>b</sup>. diffraction precision index

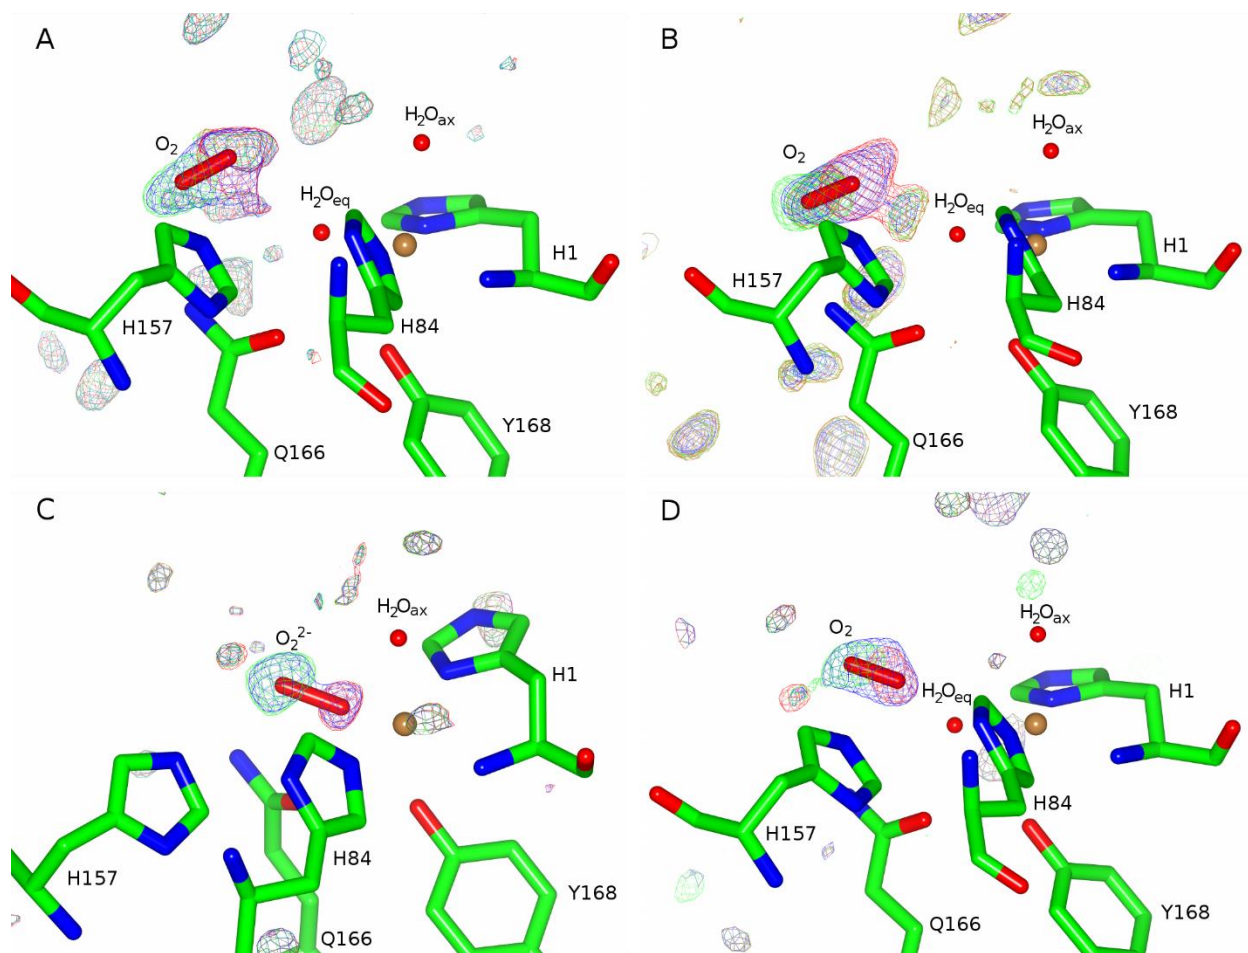

**Figure S1.** Electron density  $F_{O}-F_{C}$  omit maps for oxygen species in untreated and ascorbate-treated X-ray models. Panels A-B show NCS molecules A and B of 5TKG (resting state) with omit density calculated for molecular oxygen. Panels C-D show NCS molecules A and B of 5TKH (ascorbate treated) with omit density calculated for peroxide and molecular oxygen. Omit maps are contoured at  $\sigma = 3.5$  with density (positive  $F_{O}-F_{C}$  contours) from omitting both oxygens, the proximal oxygen and the distal oxygen shown in blue, red and green, respectively. Maps extend 10.0 Å radially around the omitted oxygen atoms.

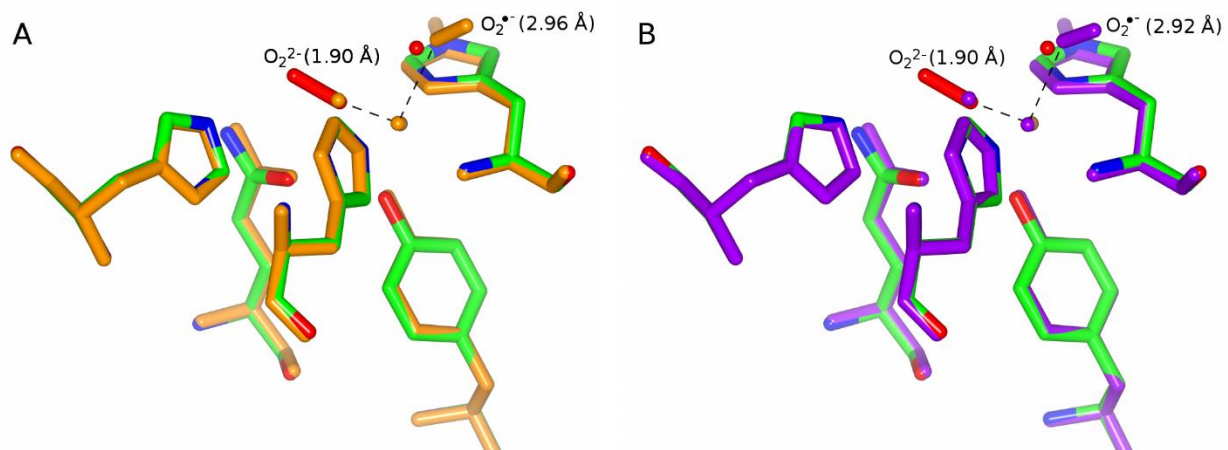

**Figure S2.** Superposition of copper–dioxo model (PDB 5TKH) with PDB 4EIR. Panel A shows PDB 5TKH NCS molecule A superimposed with PDB 4EIR NCS molecule A (orange) along with the identity of the oxygen species in the respective models and the Cu–O1 distance. Panel B shows the same comparison for PDB 4EIR NCS molecule B (purple).

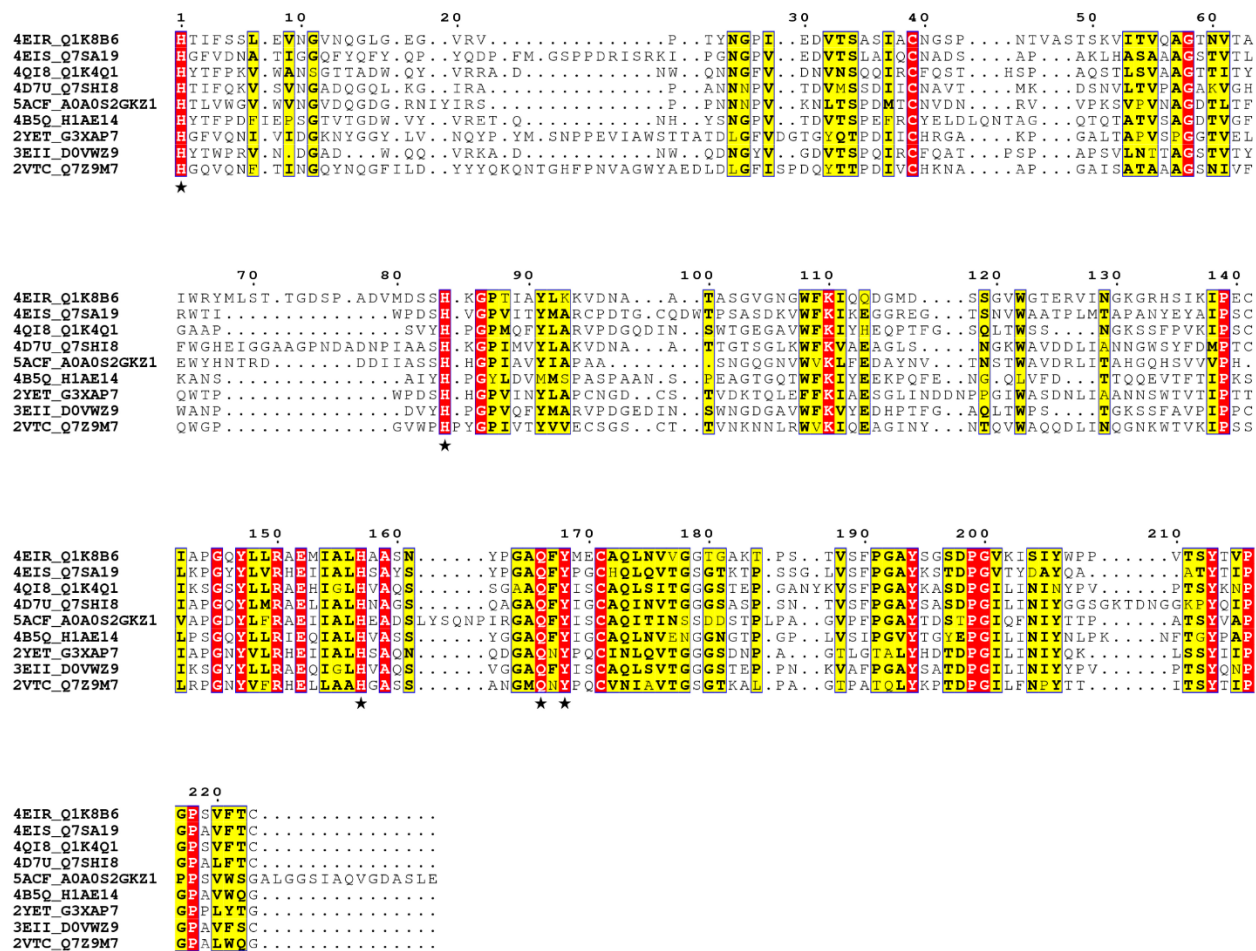

**Figure S3.** Multiple sequence alignment of AA9 proteins with known crystal structures. Sequences are identified by PDB and Uniprot accession codes. Strictly conserved residues are highlighted in red, and highly conserved residues are highlighted in yellow. Residues discussed in the main text are denoted by a star.



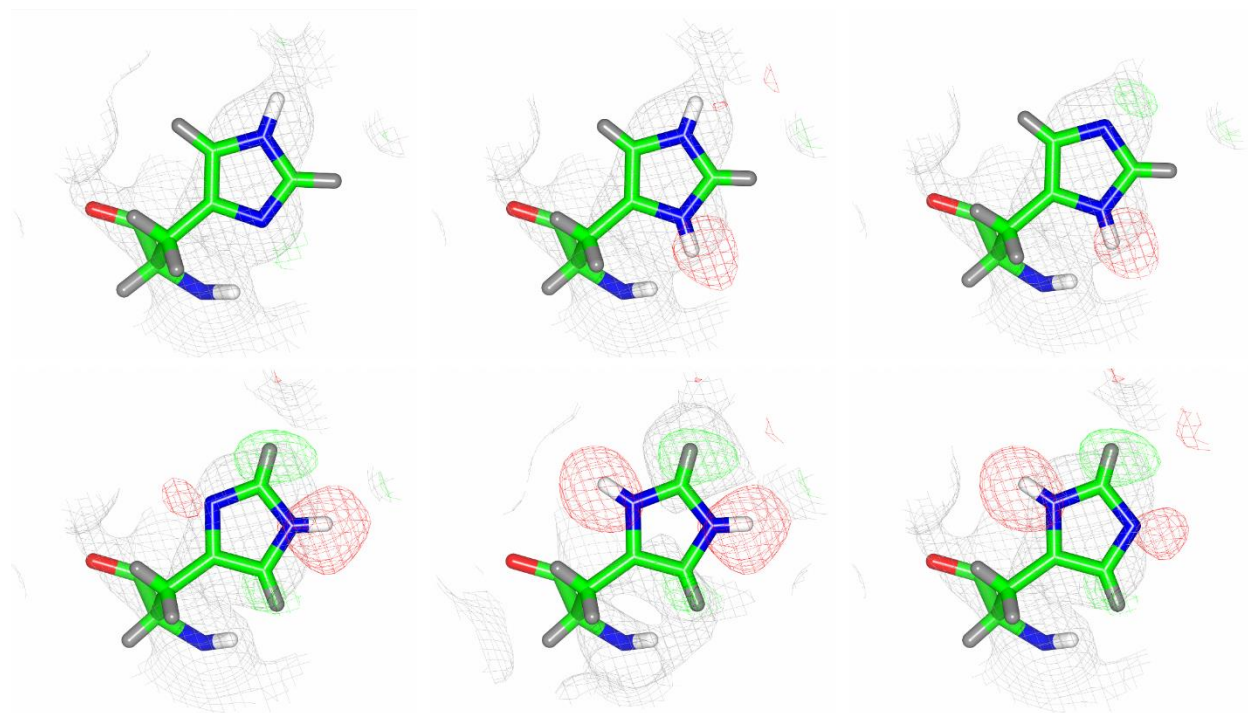

**Figure S4.** Fits of His157 conformational and protonation states with observed neutron scattering length density. Six forms of His157 were refined for both NCS molecules. (NCS molecule A is shown.) Neutron scattering length density (SLD) is shown in gray as  $2F_o - F_c$  maps contoured at  $\sigma = 1.0$ . Positive and negative excess neutron SLD from  $F_o - F_c$  maps contoured at  $\sigma = 2.5$  is shown in green and red, respectively. The form shown at upper left was used in the joint X-ray/neutron refined model (PDB 5TKI).

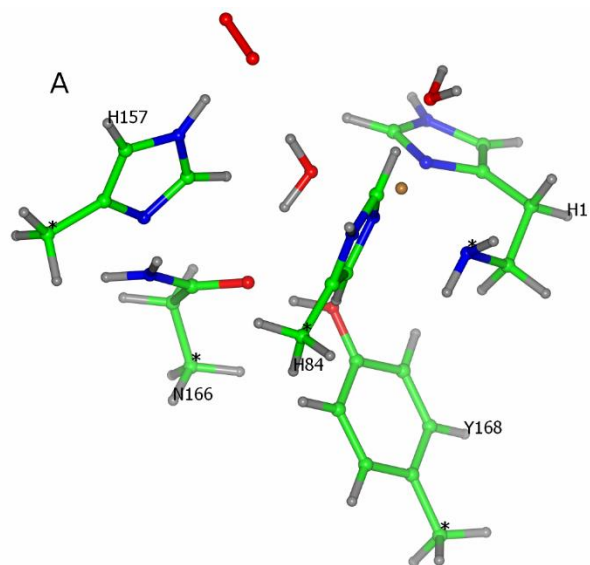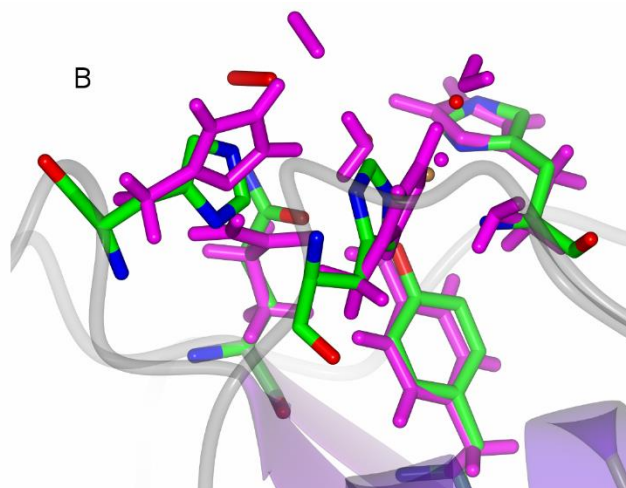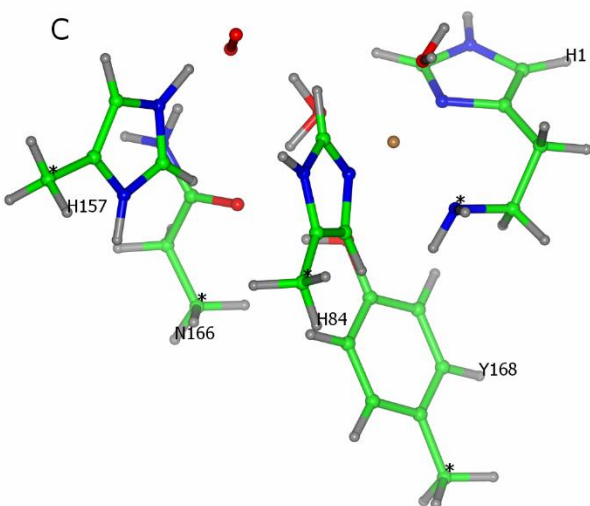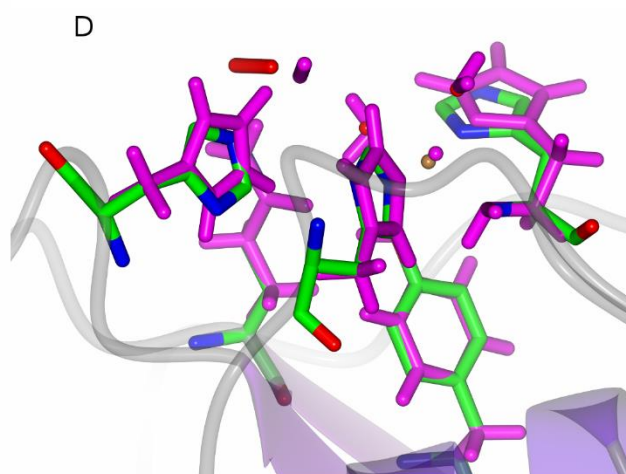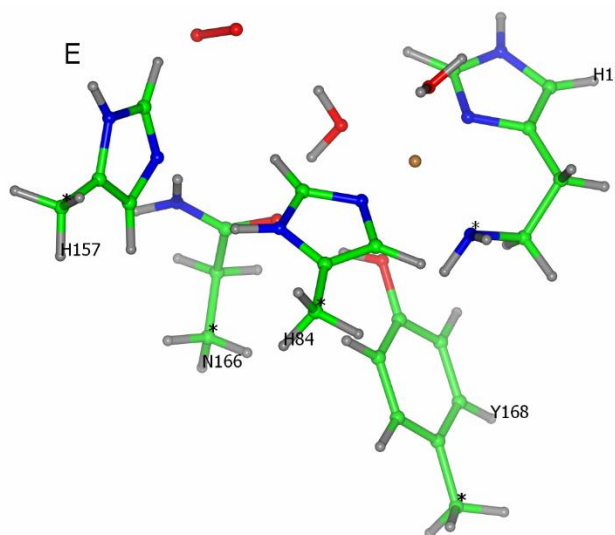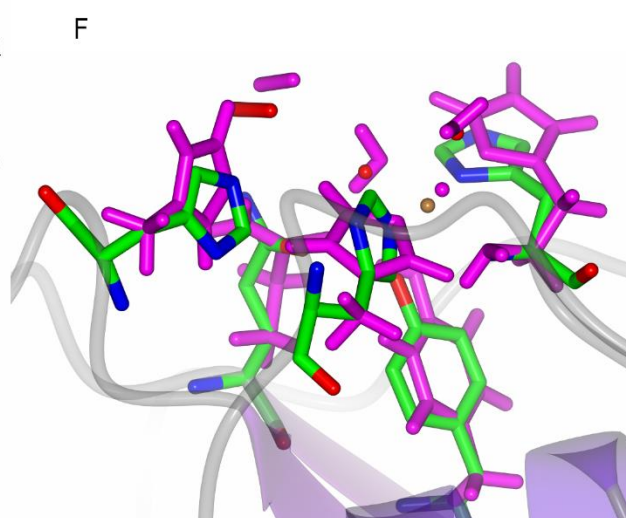

**Figure S5.** Geometry optimized DFT active site models and the same superimposed with NCS molecule B resting state active site structure (PDB 5TKG). For the superimposed structures, the active site models are colored in magenta. Panel A-B: “neutral” active site model. Panel C-D: “positive” active site model. Panel E-F: “neutral, flipped” active site model.

**Table S5.** Atomic coordinates of geometry optimized DFT active site models.

| residue | atom | neutral, flipped |          |          | positive |          |          | neutral  |          |          |
|---------|------|------------------|----------|----------|----------|----------|----------|----------|----------|----------|
|         |      | X                | y        | z        | x        | y        | z        | x        | y        | z        |
| His1    | N    | -2.38986         | -0.69716 | 1.61173  | 2.36208  | -0.66290 | -1.61145 | -2.11943 | -1.43018 | 1.81345  |
| His1    | H2   | -2.22257         | 0.29737  | 1.44727  | 2.27782  | 0.34053  | -1.44547 | -1.96529 | -0.46293 | 2.10000  |
| His1    | H3   | -2.27977         | -0.82816 | 2.61709  | 2.05805  | -0.80800 | -2.57416 | -1.92213 | -1.97729 | 2.65354  |
| His1    | CA   | -3.81072         | -0.98818 | 1.28475  | 3.80215  | -1.00963 | -1.50661 | -3.55431 | -1.62007 | 1.46452  |
| His1    | HA   | -4.00859         | -0.59507 | 0.28575  | 4.21398  | -0.46091 | -0.65719 | -3.84198 | -0.83363 | 0.76428  |
| His1    | H    | -4.46188         | -0.46536 | 1.99203  | 4.32641  | -0.67366 | -2.40682 | -4.16938 | -1.51915 | 2.36381  |
| His1    | CB   | -4.08216         | -2.49356 | 1.33212  | 4.01672  | -2.51396 | -1.30652 | -3.77215 | -2.99529 | 0.82754  |
| His1    | HB1  | -3.72929         | -2.89832 | 2.29132  | 3.47942  | -3.06967 | -2.08677 | -3.35911 | -3.76815 | 1.49024  |
| His1    | HB2  | -5.16135         | -2.66392 | 1.30371  | 5.07836  | -2.74003 | -1.43774 | -4.84467 | -3.19220 | 0.75768  |
| His1    | CG   | -3.44471         | -3.20118 | 0.17938  | 3.58520  | -2.94803 | 0.05801  | -3.16917 | -3.08655 | -0.54002 |
| His1    | CD2  | -3.98001         | -4.10987 | -0.69341 | 4.25372  | -3.66832 | 1.01166  | -3.71914 | -3.55276 | -1.70413 |
| His1    | HD2  | -4.95741         | -4.56154 | -0.74456 | 5.22727  | -4.13120 | 1.00871  | -4.68740 | -3.97668 | -1.91604 |
| His1    | ND1  | -2.13881         | -2.93457 | -0.21020 | 2.35653  | -2.56729 | 0.57770  | -1.88224 | -2.63773 | -0.81499 |
| His1    | CE1  | -1.90023         | -3.66386 | -1.29676 | 2.28991  | -3.04152 | 1.81748  | -1.66877 | -2.83335 | -2.11529 |
| His1    | HE1  | -0.98781         | -3.66236 | -1.86802 | 1.46758  | -2.89628 | 2.49809  | -0.77217 | -2.56982 | -2.65110 |
| His1    | NE2  | -2.98747         | -4.39018 | -1.60869 | 3.41646  | -3.71777 | 2.10753  | -2.75610 | -3.38772 | -2.67666 |
| His1    | HE2  | -3.06710         | -5.01483 | -2.39953 | 3.61672  | -4.17136 | 2.98824  | -2.84841 | -3.63368 | -3.65331 |
| His84   | CB   | 1.77894          | 1.76665  | 4.17943  | -2.08016 | 1.50860  | -4.01065 | 1.99450  | 1.90998  | 3.45482  |
| His84   | HB1  | 2.65120          | 1.42845  | 4.74869  | -2.17045 | 1.07862  | -5.01355 | 1.89623  | 1.93966  | 4.54458  |
| His84   | HB2  | 0.93541          | 1.84011  | 4.86808  | -1.37139 | 2.33675  | -4.06146 | 1.37040  | 2.70043  | 3.03490  |
| His84   | H    | 1.99629          | 2.7718   | 3.80289  | -3.05906 | 1.91372  | -3.73304 | 3.03677  | 2.13449  | 3.20546  |
| His84   | CG   | 1.44659          | 0.83251  | 3.07244  | -1.60428 | 0.49344  | -3.02474 | 1.57989  | 0.59298  | 2.90355  |
| His84   | CD1  | 0.31440          | 0.11216  | 2.80832  | -0.47582 | 0.43184  | -2.24994 | 0.65810  | 0.26545  | 1.94755  |
| His84   | HD1  | -0.57654         | 0.07381  | 3.41260  | 0.31354  | 1.16464  | -2.18655 | 0.03697  | 0.92911  | 1.36916  |
| His84   | ND2  | 2.30227          | 0.5369   | 2.02865  | -2.29488 | -0.66894 | -2.72481 | 2.12533  | -0.61626 | 3.29227  |
| His84   | HD2  | 3.23819          | 0.89985  | 1.88360  | -3.17606 | -0.95557 | -3.12980 | 2.84194  | -0.74276 | 3.99548  |
| His84   | CE1  | 1.68827          | -0.31355 | 1.18593  | -1.59095 | -1.38075 | -1.81711 | 1.54313  | -1.61182 | 2.59121  |
| His84   | HE1  | 2.15850          | -0.66865 | 0.28751  | -1.91995 | -2.31488 | -1.38831 | 1.79590  | -2.65335 | 2.71039  |
| His84   | NE2  | 0.46612          | -0.59857 | 1.62508  | -0.46958 | -0.74115 | -1.51006 | 0.64211  | -1.10613 | 1.75764  |
| His157  | CB   | 7.23766          | 1.78495  | 1.45161  | -7.35610 | 1.33663  | -0.95981 | 6.83194  | 2.83725  | -0.13862 |

| residue | atom | neutral, flipped |          |          | positive |          |          | neutral  |          |          |
|---------|------|------------------|----------|----------|----------|----------|----------|----------|----------|----------|
|         |      | X                | y        | z        | x        | y        | z        | x        | y        | z        |
| His157  | HB1  | 7.42337          | 1.33241  | 2.43169  | -7.17452 | 1.78390  | -1.94256 | 6.46984  | 3.61058  | 0.54743  |
| His157  | HB2  | 6.87685          | 2.80284  | 1.61126  | -7.69350 | 2.13196  | -0.28721 | 6.75757  | 3.24154  | -1.15394 |
| His157  | H    | 8.19699          | 1.84588  | 0.92676  | -8.16761 | 0.61435  | -1.06114 | 7.88701  | 2.65715  | 0.07794  |
| His157  | CG   | 6.23347          | 1.00781  | 0.66469  | -6.14124 | 0.66140  | -0.43717 | 6.04697  | 1.56566  | 0.00432  |
| His157  | CD2  | 5.02149          | 1.34887  | 0.10781  | -5.90020 | -0.63819 | -0.08306 | 6.53810  | 0.33089  | 0.35384  |
| His157  | HD2  | 4.54106          | 2.31781  | 0.11791  | -6.56063 | -1.49035 | -0.09558 | 7.53644  | -0.00122 | 0.59149  |
| His157  | ND1  | 6.40773          | -0.31769 | 0.31660  | -4.94306 | 1.32558  | -0.22011 | 4.67244  | 1.46690  | -0.20434 |
| His157  | HD1  | 7.20562          | -0.89158 | 0.55320  | -4.78591 | 2.31427  | -0.36610 | --       | --       | --       |
| His157  | CE1  | 5.33417          | -0.71623 | -0.41525 | -4.02459 | 0.46161  | 0.24383  | 4.36693  | 0.19974  | 0.01729  |
| His157  | HE1  | 5.23689          | -1.71728 | -0.80808 | -3.00062 | 0.70410  | 0.49047  | 3.37851  | -0.22881 | -0.05858 |
| His157  | NE2  | 4.46618          | 0.26869  | -0.56372 | -4.59026 | -0.73573 | 0.33615  | 5.45904  | -0.52707 | 0.35905  |
| His157  | HE2  | --               | --       | --       | -4.03054 | -1.66235 | 0.61698  | 5.48586  | -1.51677 | 0.55535  |
| Gln166  | CB   | 0.55719          | 3.92806  | -2.52961 | -0.49949 | 3.72088  | 2.60619  | -0.70692 | 3.95878  | -2.84437 |
| Gln166  | HB1  | 0.08141          | 4.68934  | -3.15259 | -0.40952 | 4.66098  | 3.15588  | -1.11576 | 4.36618  | -3.77147 |
| Gln166  | HB2  | 1.56932          | 4.26870  | -2.29229 | -0.99570 | 3.93047  | 1.65507  | -0.30438 | 4.79049  | -2.25999 |
| Gln166  | H    | -0.01214         | 3.85176  | -1.60022 | 0.50916  | 3.36153  | 2.39625  | -1.53182 | 3.51011  | -2.29313 |
| Gln166  | CG   | 0.58291          | 2.58317  | -3.28237 | -1.29394 | 2.71322  | 3.44042  | 0.39092  | 2.93570  | -3.18870 |
| Gln166  | HG1  | -0.43585         | 2.25997  | -3.51066 | -0.76338 | 2.48616  | 4.37392  | -0.05000 | 2.09089  | -3.73072 |
| Gln166  | HG2  | 1.12080          | 2.69406  | -4.22899 | -2.26005 | 3.13424  | 3.74357  | 1.12232  | 3.39619  | -3.85722 |
| Gln166  | CD   | 1.23078          | 1.50111  | -2.44610 | -1.55783 | 1.39155  | 2.73945  | 1.10331  | 2.35275  | -1.98521 |
| Gln166  | NE2  | 2.54476          | 1.31728  | -2.57603 | -2.39700 | 0.53382  | 3.32784  | 2.39823  | 2.57987  | -1.85632 |
| Gln166  | HE21 | 3.06406          | 1.88312  | -3.23192 | -2.82086 | 0.75002  | 4.21842  | 2.86918  | 3.13490  | -2.55780 |
| Gln166  | HE22 | 3.09010          | 0.75144  | -1.91163 | -2.58400 | -0.38039 | 2.90735  | 3.00585  | 2.21861  | -1.10324 |
| Gln166  | OE1  | 0.54639          | 0.83307  | -1.62363 | -1.02533 | 1.10983  | 1.63330  | 0.47262  | 1.63972  | -1.12817 |
| Tyr168  | CB   | -5.08149         | 5.25240  | 0.81138  | 4.84070  | 5.27883  | -1.10414 | -5.79294 | 4.36090  | 1.47791  |
| Tyr168  | HB1  | -5.08548         | 6.09622  | 0.11080  | 5.01011  | 6.04570  | -0.33834 | -6.07377 | 5.18337  | 0.80181  |
| Tyr168  | HB2  | -4.64160         | 5.60806  | 1.74746  | 4.37047  | 5.77280  | -1.95920 | -5.41609 | 4.81884  | 2.39538  |
| Tyr168  | H    | -6.12621         | 4.99070  | 1.00557  | 5.82479  | 4.91931  | -1.42030 | -6.70516 | 3.79847  | 1.68975  |
| Tyr168  | CG   | -4.31159         | 4.07747  | 0.24848  | 3.98533  | 4.15755  | -0.57267 | -4.76240 | 3.51614  | 0.81433  |
| Tyr168  | CD1  | -4.90569         | 3.20030  | -0.67323 | 4.54755  | 3.11848  | 0.18353  | -5.14610 | 2.41701  | -0.01049 |
| Tyr168  | HD1  | -5.94427         | 3.35074  | -0.95710 | 5.62025  | 3.10602  | 0.35782  | -6.20118 | 2.19467  | -0.13080 |

| residue | atom | neutral, flipped |          |          | positive |          |          | neutral  |          |          |
|---------|------|------------------|----------|----------|----------|----------|----------|----------|----------|----------|
|         |      | X                | y        | z        | x        | y        | z        | x        | y        | z        |
| Tyr168  | CD2  | -2.97634         | 3.83872  | 0.59448  | 2.60182  | 4.13877  | -0.78095 | -3.37195 | 3.81219  | 0.96178  |
| Tyr168  | HD2  | -2.48625         | 4.49036  | 1.31372  | 2.13912  | 4.92727  | -1.36878 | -3.07949 | 4.64973  | 1.58634  |
| Tyr168  | CE1  | -4.19594         | 2.14911  | -1.24769 | 3.76041  | 2.11124  | 0.73537  | -4.20666 | 1.65463  | -0.65143 |
| Tyr168  | HE1  | -4.66207         | 1.49153  | -1.97480 | 4.19820  | 1.32895  | 1.34760  | -4.47924 | 0.82674  | -1.29612 |
| Tyr168  | CE2  | -2.24886         | 2.78174  | 0.03524  | 1.79659  | 3.13229  | -0.24386 | -2.41304 | 3.06736  | 0.32706  |
| Tyr168  | HE2  | -1.21079         | 2.62162  | 0.31717  | 0.72241  | 3.14354  | -0.40541 | -1.35874 | 3.29745  | 0.43231  |
| Tyr168  | CZ   | -2.85211         | 1.94073  | -0.91008 | 2.37532  | 2.12170  | 0.53333  | -2.81117 | 1.96196  | -0.49968 |
| Tyr168  | OH   | -2.19885         | 0.89636  | -1.50544 | 1.63925  | 1.11552  | 1.10148  | -1.96097 | 1.21769  | -1.14208 |
| Tyr168  | HH   | -1.22169         | 1.01003  | -1.47009 | 0.69353  | 1.36447  | 1.18074  | -0.92237 | 1.50019  | -1.13513 |
| Copper  | CU   | -0.87737         | -1.71927 | 0.68548  | 0.98200  | -1.53333 | -0.38304 | -0.62300 | -1.91951 | 0.49636  |
| Oxygen  | O1   | 3.39169          | -2.29823 | -3.12227 | -2.42843 | -2.15822 | 1.92860  | 3.70441  | -3.17427 | -2.52793 |
| Oxygen  | O2   | 3.09489          | -2.83528 | -2.07394 | -3.05499 | -2.66702 | 0.86975  | 3.33494  | -2.74898 | -1.45269 |
| Water1  | O    | 0.28036          | -1.71539 | -1.04726 | -0.07129 | -1.43325 | 1.30540  | 0.56146  | -1.19844 | -1.09107 |
| Water1  | H    | 0.50046          | -0.79102 | -1.34916 | -0.88134 | -1.98661 | 1.51622  | 1.43170  | -1.60305 | -1.22428 |
| Water1  | H    | 1.06738          | -2.26390 | -1.16686 | -0.41069 | -0.51494 | 1.41487  | 0.69705  | -0.22598 | -1.09633 |
| Water2  | O    | 0.02505          | -3.50609 | 1.67091  | 0.39729  | -3.61060 | -1.32105 | 0.18889  | -3.98010 | 0.78455  |
| Water2  | H    | 0.57356          | -3.43619 | 2.46425  | 0.06381  | -3.87069 | -2.19027 | 0.32901  | -4.45523 | 1.61552  |
| Water2  | H    | -0.43397         | -4.35538 | 1.72701  | 0.82783  | -4.39618 | -0.95790 | -0.17410 | -4.63748 | 0.17362  |

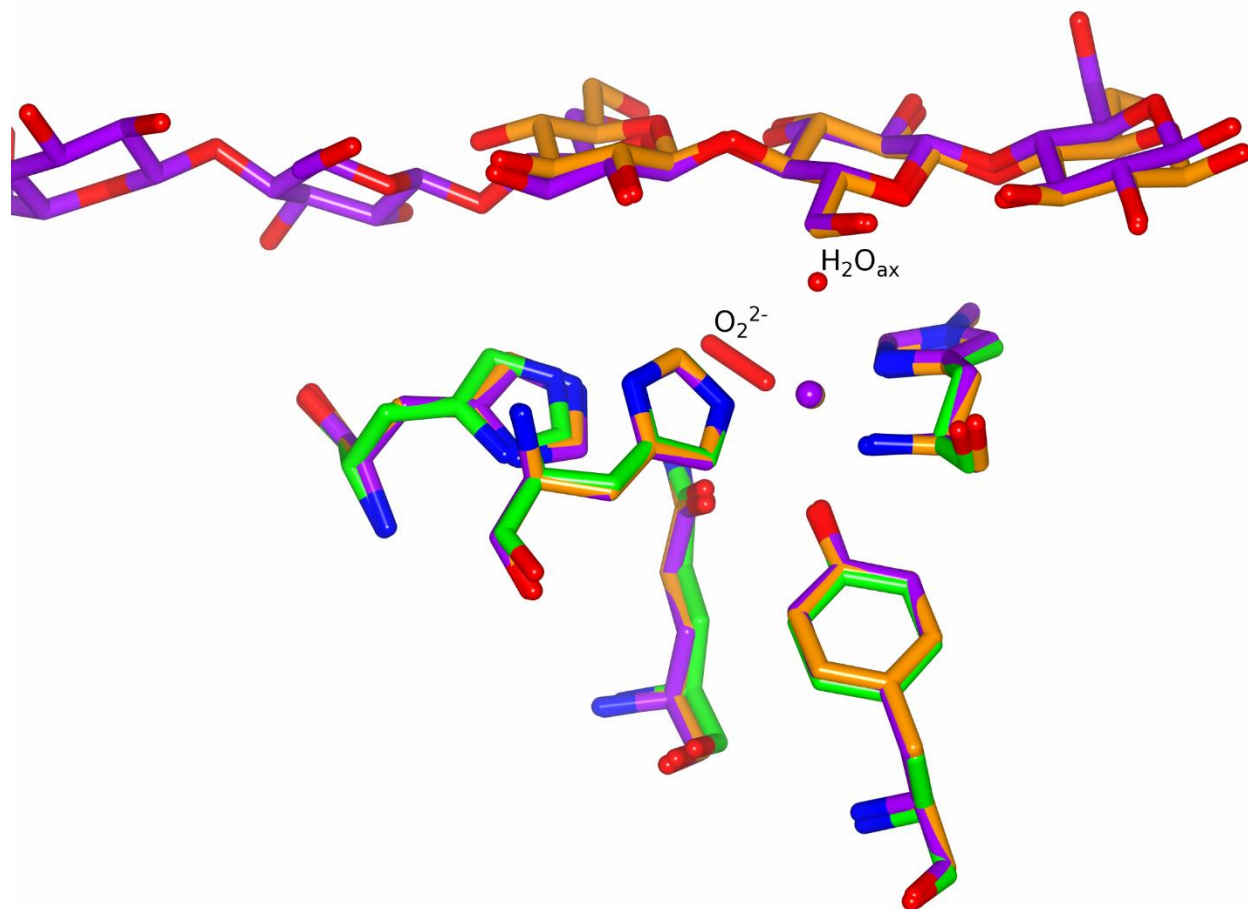

**Figure S6.** Superposition of copper–dioxo model (PDB 5TKH) with PDB 5ACJ and 5ACI. The active site of NCS molecule A from model 5TKH is shown in green with corresponding residues and substrates from 5ACJ and 5ACI shown in orange and purple, respectively. Non-hydrogen protein atoms were superimposed with RMSD = 0.25 Å (5TKH–5ACJ) and RMSD = 0.29 Å (5TKH–5ACI).

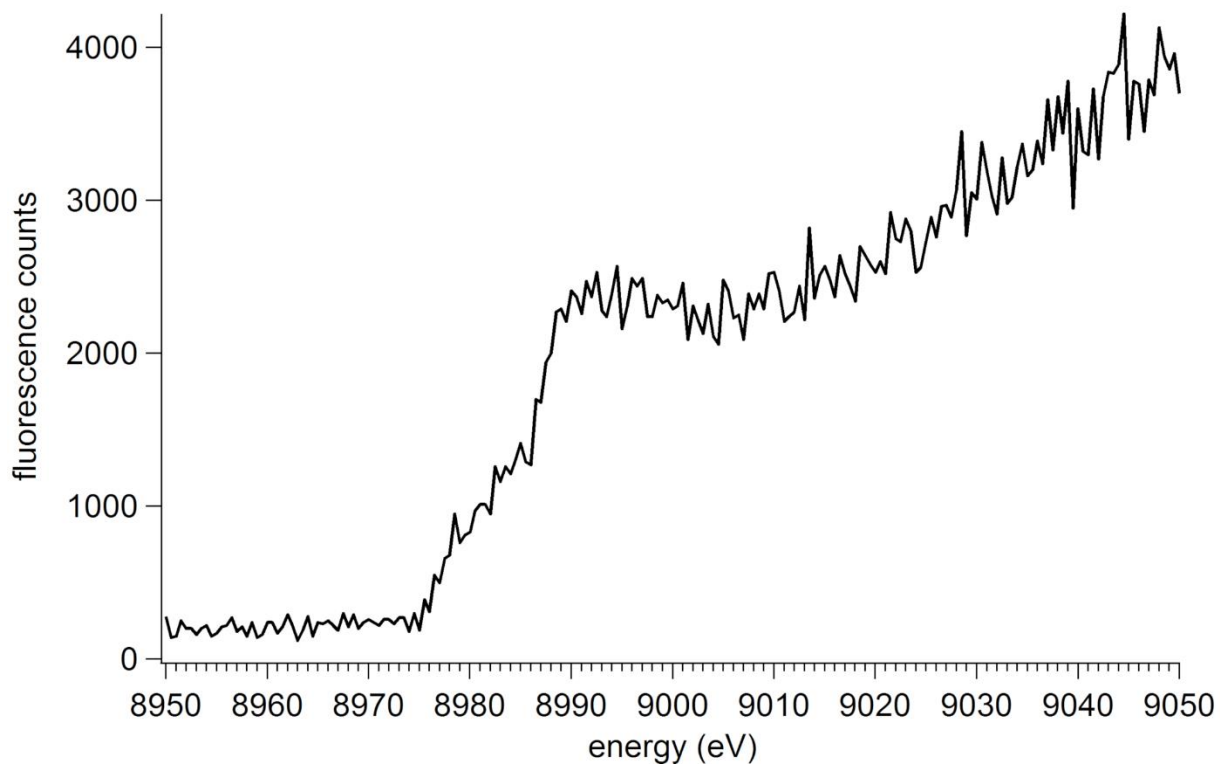

**Figure S7.** X-ray fluorescence scan of a NcPMO-2 crystal near the copper K-edge. The center of the absorption edge is near 8984 eV which is indicative of a copper(I) species.
